# Supplementary material for: Validation of collateral scoring on flat-detector multiphase CT angiography in patients with acute ischemic stroke
Source: PubMed Central journal article supplement (PMC6108461; doi:10.1371/journal.pone.0202592), 2018-08-24
Supplement: pone.0202592.s003.pdf [file pone.0202592.s003.pdf]

## Data Supplement

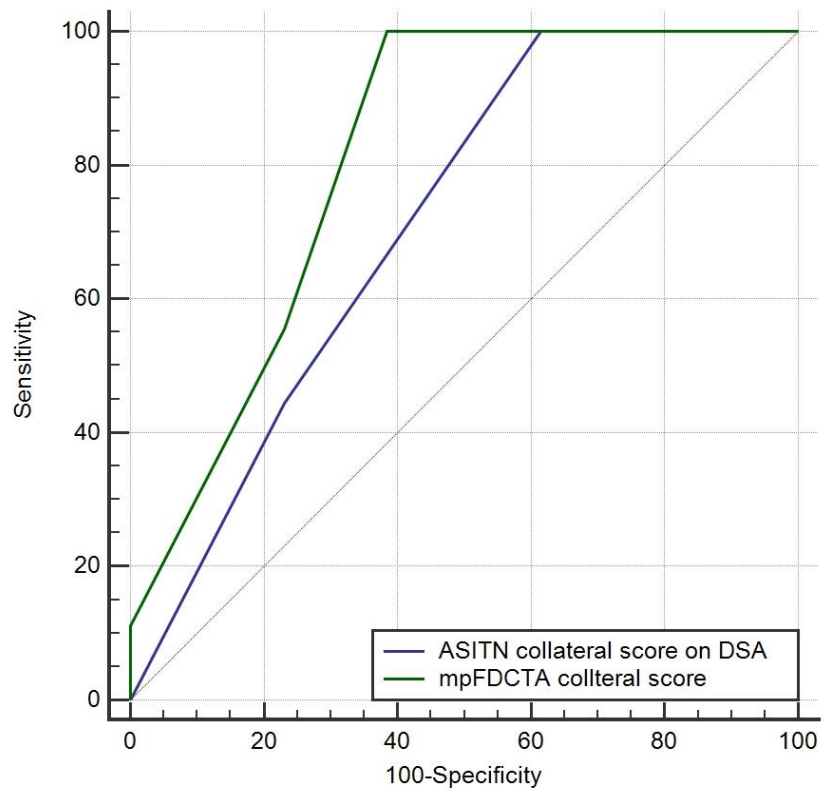

**S3 Fig:** Area under the receiver operator curve analysis for the predictive value of multiphase flat-detector CTA and ASITN collateral score on DSA for functional outcome.
