# Supplementary material for: Validation of collateral scoring on flat-detector multiphase CT angiography in patients with acute ischemic stroke
Source: PubMed Central journal article supplement (PMC6108461; doi:10.1371/journal.pone.0202592), 2018-08-24
Supplement: pone.0202592.s005.pdf [file pone.0202592.s005.pdf]

## Data Supplement

**S1 Table:** Cut-off scores with classification functions of mpFDCTA- and ASITN-DSA collateral scores for favorable functional outcome

| Cut-off score              | Favorable functional outcome (mRS $\leq$ 2) |           |             |           |       |           |       |           |
|----------------------------|---------------------------------------------|-----------|-------------|-----------|-------|-----------|-------|-----------|
|                            | Sensitivity                                 | 95% CI    | Specificity | 95% CI    | PPV   | 95% CI    | NPV   | 95% CI    |
| mpFDCTA collateral score   |                                             |           |             |           |       |           |       |           |
| > 1                        | 100                                         | 69.2-100  | 14.29       | 1.8-42.8  | 45.7  | 41.6-40.9 | 100   | n.a.      |
| > 2*                       | 100                                         | 69.2-100  | 57.14       | 28.9-82.3 | 62.74 | 48.9-74.8 | 100   | n.a.      |
| > 3                        | 50                                          | 18.7-81.3 | 78.57       | 49.2-95.3 | 63.29 | 29.2-87.8 | 68.57 | 54.3-80   |
| ASITN-DSA collateral score |                                             |           |             |           |       |           |       |           |
| > 0                        | 100                                         | 66.4-100  | 15.38       | 1.9-45.4  | 46    | 41.5-50.6 | 100   | n.a.      |
| > 1*                       | 100                                         | 66.4-100  | 38.46       | 13.9-68.4 | 53.87 | 44.6-62.9 | 100   | n.a.      |
| > 2                        | 44.44                                       | 13.7-78.8 | 76.92       | 46.2-95   | 58.08 | 24.1-85.8 | 65.5  | 50.9-77.7 |

mpFDCTA: multiphase flat-detector computed tomography angiography; ASITN: American Society of Interventional and Therapeutic Neuroradiology; DSA: digital subtraction angiography; mRS: modified Rankin Scale; PPV: positive predictive value; NPV: negative predictive value; CI: confidence interval; n.a.: not applicable
