# Supplementary material for: Validation of collateral scoring on flat-detector multiphase CT angiography in patients with acute ischemic stroke
Source: PubMed Central journal article supplement (PMC6108461; doi:10.1371/journal.pone.0202592), 2018-08-24
Supplement: pone.0202592.s006.pdf [file pone.0202592.s006.pdf]

## Data Supplement

**S2 Table:** Cut-off scores with classification functions of mpFDCTA- and ASITN-DSA collateral scores for a decrease of  $\leq 2$  points of the ASPECTS from baseline to routine 24 h non-contrast CT

| Cut-off score              | ASPECTS-decrease $\leq 2$ points from baseline to 24 h ncCT |        |             |        |      |        |      |        |
|----------------------------|-------------------------------------------------------------|--------|-------------|--------|------|--------|------|--------|
|                            | Sensitivity                                                 | 95% CI | Specificity | 95% CI | PPV  | 95% CI | NPV  | 95% CI |
| mpFDCTA collateral score   |                                                             |        |             |        |      |        |      |        |
| > 2                        | 81                                                          | 54-96  | 63          | 25-92  | 90   | 68-98  | 4    | 16-76  |
| > 3*                       | 50                                                          | 25-75  | 100         | 63-100 | n.a. | n.a.   | n.a. | n.a.   |
| > 4                        | 6,25                                                        | 0-30   | 100         | 63-100 | n.a. | n.a.   | n.a. | n.a.   |
| ASITN-DSA collateral score |                                                             |        |             |        |      |        |      |        |
| > 1                        | 87                                                          | 60-98  | 43          | 10-82  | 83   | 67-92  | 50   | 14-86  |
| > 2*                       | 47                                                          | 21-73  | 100         | 59-100 | n.a. | n.a.   | n.a. | n.a.   |
| > 3                        | 0                                                           | 0-22   | 100         | 59-100 | n.a. | n.a.   | n.a. | n.a.   |

mpFDCTA: multiphase flat-detector computed tomography angiography; ASITN: American Society of Interventional and Therapeutic Neuroradiology; DSA: digital subtraction angiography; ASPECTS: Alberta Stroke Program Early CT Scale; ncCT: Non-contrast computed tomography; CI: confidence interval; PPV: positive predictive value; NPV: negative predictive value; n.a.: not applicable
