# Supplementary material for: Validation of collateral scoring on flat-detector multiphase CT angiography in patients with acute ischemic stroke
Source: PLOS journal article supplement (doi:10.1371/journal.pone.0202592), 2018-08-24
Supplement: S4 (10.1371/journal.pone.0202592.s004) [file journal.pone.0202592.s004]

## Data Supplement

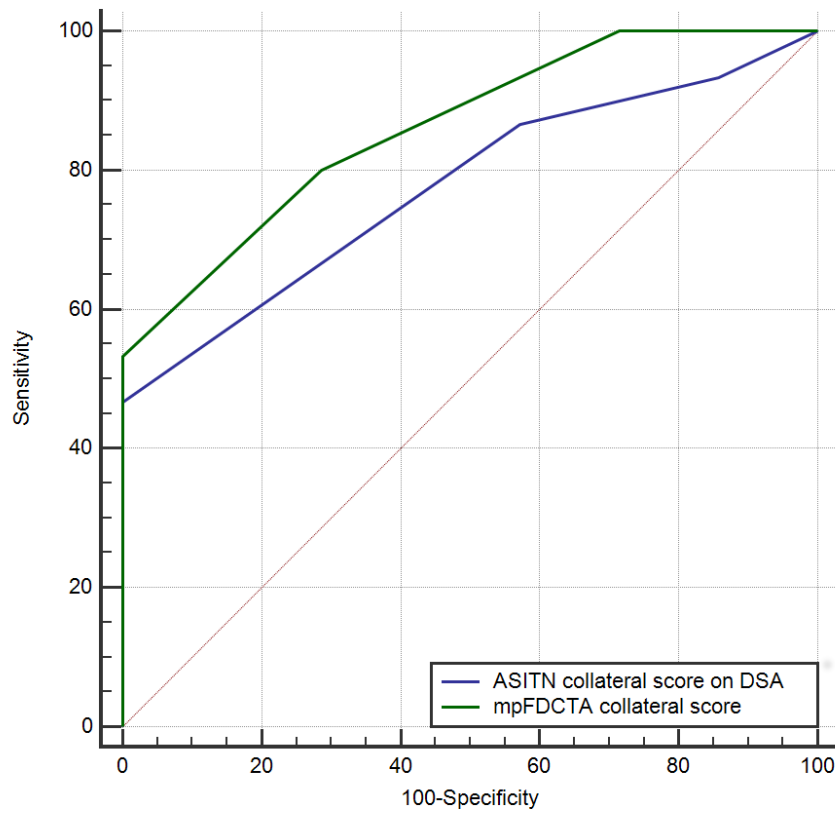

**S4 Fig:** Area under the receiver operator curve analysis for the predictive value of multiphase flat-detector CTA and ASITN collateral score on DSA for ASPECTS decay of  $\geq 2$  points.
